# Supplementary material for: Stressors and support system among parents of neonates hospitalised with systemic infections: qualitative study in South India
Source: PubMed Central journal article supplement (PMC7788219; doi:10.1136/archdischild-2020-319226), 2020-11-11
Supplement: archdischild-2020-319226supp002.pdf [file archdischild-2020-319226supp002.pdf]

## Supplement 2: In-depth Interview Guide

### 1. Let us talk about your baby. Can you tell me why you are here?

*Probe: present condition, knowledge about diagnosis*

### 2. Talking about your experience, how do you feel about having your baby admitted here?

*Probe: different feelings- positive and negative, spouse's feelings*

### 3. What stresses you about having your baby admitted here?

*Probe: baby, environment, peers, staff*

**Alternate question if the participant doesn't respond: Can you tell me an instance when you felt negative (e.g. anxious/ sad/ angry/ helpless)**

**And positive (e.g. happy) such emotions in the NICU?**

*Probe for various emotions mentioned in Question 2*

### 5: What do you feel/think the baby goes through? Do you discuss it with anyone?

*Probe - Pain?*

*- Discuss with immediate family, peers, neighbours, NICU staff.*

### 6. How do you cope when you are faced with this situation?

*Probe: present condition, knowledge about diagnosis*

### 7. Do you have any earlier experiences with seeking care for sick babies?

*Probe - In your family? Among you friends?*

**8. Let us discuss about the expenses related to your baby's condition. Can you tell me how you and/or your family mobilized the money for your child's treatment?** *(assess if guardian is willing to speak. If yes, continue. If not, reassure him/her and ask if they can answer now. Else, come back again)*

| Source                                                                                                                                                    | Yes? |
|-----------------------------------------------------------------------------------------------------------------------------------------------------------|------|
| It was free                                                                                                                                               |      |
| Salary/Savings                                                                                                                                            |      |
| Working overtime                                                                                                                                          |      |
| Mortgaging of assets (jewellery, land, livestock, etc)                                                                                                    |      |
| Selling of assets (jewellery, land, livestock, etc)                                                                                                       |      |
| Borrowed from relatives/friends without interest                                                                                                          |      |
| Borrowed from relatives/friends with interest                                                                                                             |      |
| Loan (moneylender, bank)                                                                                                                                  |      |
| Health insurance<br>a) BPL free/poor free b) Government employee c) RSBY d) Private Insurance e) NRHM<br>scheme f) ESI g) Any other, specify..... g) None |      |
| Others, specify                                                                                                                                           |      |

### 9. Has the illness affected the family financially? What changes or adjustments did you have to make in your daily life due to your child's illness?

*Probe- cutting down costs), Work, Household chores, Accommodation, Baby sitting*

*Others- child education, food security, changes in spouse's life*

#### Closing questions:

### 10. What is the one thing that is on your mind right now?

### 11. What help could you have received to make this entire experience better?

*Probe- Health, finances, support (peer, family, health system)*

Is there anything else you would like to tell me? Do you have any questions for me?

-Thank you for your patience and time.

- End of interview-
