# Supplementary material for: Stressors and support system among parents of neonates hospitalised with systemic infections: qualitative study in South India
Source: PubMed Central journal article supplement (PMC7788219; doi:10.1136/archdischild-2020-319226), 2020-11-11
Supplement: archdischild-2020-319226supp003.pdf [file archdischild-2020-319226supp003.pdf]

**Supplement 3****a. Reasons for exclusion**

| <b>Number of participants</b> | <b>Reason for denial of consent/exclusion</b>                                                    |
|-------------------------------|--------------------------------------------------------------------------------------------------|
| 6                             | Too stressed to talk                                                                             |
| 2                             | Repeatedly (more than three times) unavailable for interview despite providing consent           |
| 1                             | Shifted (against medical advice) the baby to a government facility after agreeing to participate |
