# Supplementary material for: Stressors and support system among parents of neonates hospitalised with systemic infections: qualitative study in South India
Source: PubMed Central journal article supplement (PMC7788219; doi:10.1136/archdischild-2020-319226), 2020-11-11
Supplement: archdischild-2020-319226supp004.pdf [file archdischild-2020-319226supp004.pdf]

### Supplement 4: Financing of NICU-related costs

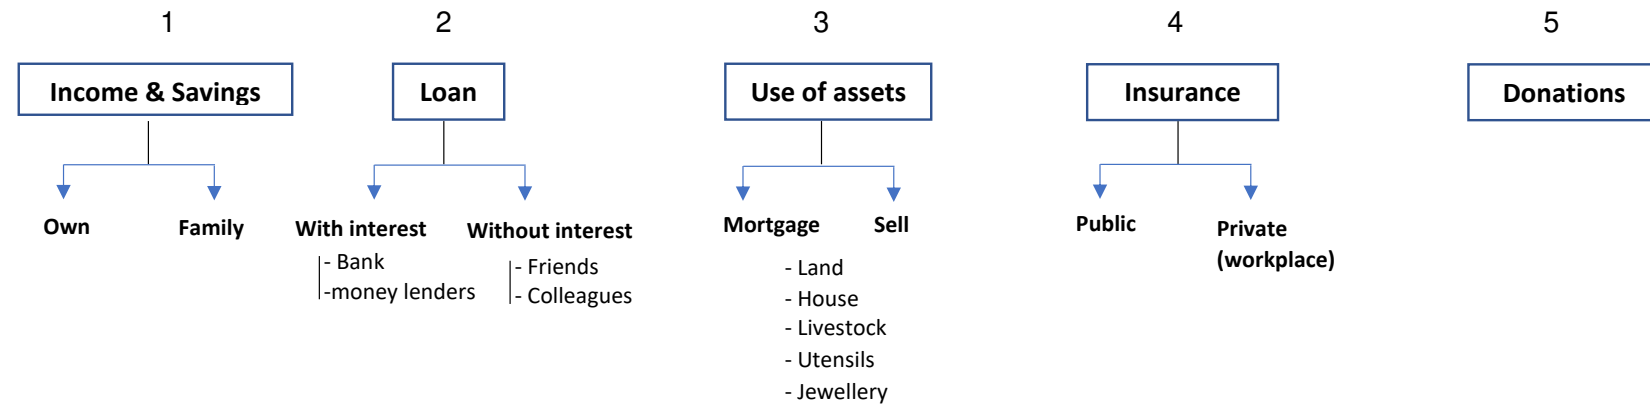

**Strategies of financing:** There were 3 ways in which families financed for the NICU-related costs:

1. Completely out of pocket: Families paid entirely through out-of-pocket financed through savings and/or income, contributions by relatives and friends, sale or mortgaging of physical assets
2. Combination: Families arranged to pay by a combination of out of pocket payments, acquiring loans, partial insurance cover (private/public) and/or donations from charities or financial trusts (only for those below poverty line).
3. Completely covered by insurance: A final type was where the entire expenses was covered by insurance.
